1 **Single-cell sequencing of mouse thymocytes reveals mutational**  
2 **landscape shaped by replication errors, mismatch repair and H3K36me3**

3

4 Elli-Mari Aska<sup>1, 2, \*</sup> [elli.aska@helsinki.fi](mailto:elli.aska@helsinki.fi)

5 Denis Dermadi Bebek<sup>2, 3, 4, \*</sup> [ddermadi@stanford.edu](mailto:ddermadi@stanford.edu)

6 Liisa Kauppi<sup>1, 2, \*</sup> [liisa.kauppi@helsinki.fi](mailto:liisa.kauppi@helsinki.fi)

7

8 1 Systems Oncology (ONCOSYS) Research Program, Research Programs Unit, Faculty  
9 of Medicine, University of Helsinki, Helsinki, Finland

10

11 2 Department of Biochemistry and Developmental Biology, Faculty of Medicine, University  
12 of Helsinki, Helsinki, Finland

13

14 3 Laboratory of Immunology and Vascular Biology, Department of Pathology, School of  
15 Medicine, Stanford University, Stanford, CA, United States

16

17 4 Stanford Center for Biomedical Informatics Research, Department of Medicine, Stanford  
18 University, Stanford, CA, United States

19

20 \*to whom correspondence should be addressed

21

22

23 **ABSTRACT**

24 **Background**

25 DNA mismatch repair (MMR) safeguards genome stability by correcting errors made  
26 during DNA replication. *In vitro* evidence indicates that the MMR machinery is recruited to  
27 chromatin via H3K36me3, a histone mark enriched in 3' exons of genes and associated  
28 with transcriptional activity. To dissect how replication errors, abundance of H3K36me3  
29 and MMR together shape the mutational landscape in normal mammalian cells, we applied  
30 single-cell exome sequencing to thymic T cells isolated from MMR-proficient (*Mlh1*<sup>+/+</sup>) and  
31 MMR-deficient (*Mlh1*<sup>-/-</sup>) mice.

32 **Results**

33 Using single-cell exome sequencing we identified short deletions as sensitive and  
34 quantifiable reporters of MMR-dependent mutations. We found H3K36me3-enriched  
35 *Huwe1* and *Mcm7* genes to be mutational hotspots exclusive to *Mlh1*<sup>-/-</sup> T cells. In *Mlh1*<sup>+/+</sup>  
36 cells, exons of H3K36me3-enriched genes had a lower mutation frequency compared to  
37 H3K36me3-depleted genes. Moreover, within transcriptionally active genes, 3' exons,  
38 often H3K36me3-enriched, rather than 5' exons had significantly fewer MMR-dependent  
39 mutations, indicating that MMR operates more efficiently within 3' exons in *Mlh1*<sup>+/+</sup> T cells.

40 **Conclusions**

41 Our results provide evidence that H3K36me3 confers preferential MMR-mediated  
42 protection from transcription-associated deleterious replication errors. This offers an  
43 attractive concept of thrifty MMR targeting, where genes critical for the development of  
44 given cell type are preferentially shielded from *de novo* mutations by H3K36me3-guided  
45 MMR.

46

47 **KEYWORDS**

48 single-cell sequencing, whole exome sequencing, DNA mismatch repair, H3K36me3,  
49 mutation, replication errors, transcription, T cell, histone modification

50

## 51 **BACKGROUND**

52 Maintaining genomic integrity during DNA replication is crucial for cellular homeostasis,  
53 especially in protein-coding regions. Occasionally, DNA replication errors occur, of which  
54 most, but not all, are corrected by the intrinsic proofreading activity of DNA polymerases  
55 (1). DNA mismatch repair (MMR) corrects base-base mismatches and small insertion-  
56 deletion (indel) loops that have escaped proofreading, and thereby protects the genome  
57 from replication induced permanent mutations (2). MMR initiates when the MSH2/MSH6  
58 (MutS $\alpha$ ) or MSH2/MSH3 (MutS $\beta$ ) complex recognizes and binds DNA lesions, a step  
59 followed by recruitment of the MLH1/PMS2 (MutL $\alpha$ ) complex that triggers the excision and  
60 repair of the mismatch (3, 4).

61

62 MSH6 of MutS $\alpha$  can bind to trimethylated histone H3 lysine 36 (H3K36me3) and recruit  
63 the MMR machinery to chromatin (5). H3K36me3 is found in exonic regions and enriched  
64 at the 3' ends of transcribed genes (6), but also in constitutive and facultative  
65 heterochromatin (7). Genome-wide mutational analyses of MMR-deficient cell lines and  
66 tumors have shown that presence of H3K36me3 reduces local mutation rate (8, 9).  
67 Moreover, MMR operates more efficiently in H3K36me3-enriched exons compared to  
68 introns (10), and in actively transcribed genes compared to silent genes (11).

69

70 MMR deficiency has been extensively modeled in *Mlh1*<sup>-/-</sup> mice, which display high  
71 microsatellite instability (MSI) and increased mortality due to lymphomas and/or  
72 gastrointestinal tumors (12-15). MSI occurs due to the propensity of microsatellites (short

73 tandem repeat sequences) to undergo strand slippage during DNA replication, which in  
74 MMR-deficient cells leads to deletion or insertion mutations within repeats. Recently,  
75 analysis of genome-wide mutations in *Mlh1*<sup>-/-</sup> T cell lymphomas revealed several putative  
76 drivers of tumorigenesis (16).

77

78 To delineate how the mutational landscape in normal mammalian cells is shaped, on one  
79 hand, by replication errors, and on the other hand, by H3K36me3-mediated MMR  
80 correction, we performed single-cell whole exome sequencing (scWES) on T cells isolated  
81 from MMR-proficient (*Mlh1*<sup>+/+</sup>) and MMR-deficient (*Mlh1*<sup>-/-</sup>) mice. Comparison of mutation  
82 distribution and frequency between MMR-proficient and -deficient mice revealed *Huwe1*  
83 and *Mcm7* genes as mutational hotspots exclusive to *Mlh1*<sup>-/-</sup> cells, implying that these  
84 regions present an inherent challenge to faithful DNA replication in T cells. Both hotspots  
85 are located in H3K36me3-enriched regions and expressed during T cell development.  
86 Analysis of MMR-dependent mutations indicate that H3K36me3-enriched 3' exons are  
87 more protected against transcription-associated replication errors.

88

## 89 RESULTS

### 90 Deletions report on MMR-dependent mutations in single-cell exome sequencing

91 We isolated naïve T cells from thymi of *Mlh1*<sup>+/+</sup> and *Mlh1*<sup>-/-</sup> mice, followed by single-cell  
92 capture and whole genome amplification on the Fluidigm C1 system, and then, by whole  
93 exome enrichment and sequencing (**Fig. 1**). Previous studies have utilized single-cell DNA  
94 sequencing to study clonality and mutation profiles of human cancers and normal cells  
95 (17-20). To check whether T cells were drawn from a similar cell population in both  
96 genotypes, we analyzed the proportions of distinct developmental thymic T cell  
97 populations (double-negative (DN), double-positive (DB), TCR αβ single-positive (CD4 or

98 CD8), TCR  $\gamma\delta$ ) (21) by FACS. Cell frequencies of different thymic T cell populations  
99 between *Mlh1*<sup>-/-</sup> and *Mlh1*<sup>+/+</sup> mice were similar to each other (**Fig. S1**), indicating no defect  
100 in normal T cell developmental progression in *Mlh1*<sup>-/-</sup> mice, and that T cells analyzed by  
101 scWES from *Mlh1*<sup>+/+</sup> and *Mlh1*<sup>-/-</sup> mice are drawn from similar thymic T cell populations. In  
102 both genotypes, the vast majority of cells were CD4<sup>+</sup>CD8<sup>+</sup> double positive T cells (67% for  
103 *Mlh1*<sup>+/+</sup> and 65% for *Mlh1*<sup>-/-</sup> mice, respectively, **Fig. S1**).

104

105 We sequenced 56 single-cell exomes in total, from 28 *Mlh1*<sup>-/-</sup> and 28 *Mlh1*<sup>+/+</sup> T cells, to an  
106 average depth of 32X and coverage of 66% at depth  $\geq 1X$  (**Fig. S2A-B**). After excluding  
107 samples with low (< 50%) coverage, 44 exomes (22 *Mlh1*<sup>+/+</sup> and 22 *Mlh1*<sup>-/-</sup> exomes) were  
108 further analyzed for genetic variants. All detected variants with annotations are listed in  
109 Additional File 1.

110

111 Overall, *Mlh1*<sup>-/-</sup> T cells had an increased percentage (O.R = 1.56, 95% CI = 1.44-1.69,  $p <$   
112  $2.2 \times 10^{-16}$ ) and frequencies ( $p = 5.487 \times 10^{-6}$ , **Fig. 2A-B, Table S1**) of indels when compared  
113 to *Mlh1*<sup>+/+</sup> T cells. Even though MMR-deficiency increases also base substitutions (22), in  
114 our data set SNV frequencies between *Mlh1*<sup>-/-</sup> and *Mlh1*<sup>+/+</sup> did not differ significantly ( $p =$   
115 0.127, **Fig. 2B, Table S1**). Analyzing insertions and deletions separately revealed that  
116 *Mlh1*<sup>-/-</sup> T cells had significantly higher deletion ( $p = 8.175 \times 10^{-12}$ ), but not insertion  
117 frequencies ( $p = 0.1801$ ) than *Mlh1*<sup>+/+</sup> T cells (**Fig. 2C, Table S1**). Taken together,  
118 deletions behaved in a genotype-dependent manner, and thus represent MMR-dependent  
119 mutations.

120

121 ***Huwe1* and *Mcm7* genes are mutational hotspots in *Mlh1*<sup>-/-</sup> T cells**

122 *Mlh1*<sup>-/-</sup> cells provide a unique opportunity to reveal which chromosomal regions represent a  
123 particular challenge to the fidelity of the replication machinery, as any errors that are  
124 introduced will remain uncorrected by MMR. To identify such regions, we analyzed  
125 mutation frequencies in 1 Mb windows across single cell exomes. On a megabase-scale,  
126 local mutational frequencies were highly heterogeneous. The majority of the high mutation  
127 frequency peaks originated only from single T cells, and mutational hotspot windows  
128 shared between individual cells were sparse (**Fig. 2D**). To establish whether any genes  
129 would emerge as MMR-dependent mutational hotspots, we scored all genes for mutations  
130 and asked which ones were mutated frequently in *Mlh1*<sup>-/-</sup> T cells (in more than 5 *Mlh1*<sup>-/-</sup>  
131 cells). Two genes, *Huwe1* and *Mcm7*, stood out with their high mutational frequencies,  
132 exclusive to *Mlh1*<sup>-/-</sup> single cell exomes (**Fig. 2E**). *Huwe1* encodes an E3 ubiquitin ligase,  
133 shown to regulate hematopoietic stem cell self-renewal and proliferation, and commitment  
134 to the lymphoid lineage (23). *Mcm7* encodes a component of the MCM2-7 complex that  
135 forms the core of the replicative helicase, responsible for unwinding DNA ahead of the  
136 replication fork (24). However, only *Mcm7* possessed potentially deleterious mutations in  
137 our data set (**Fig. 2E**). Both genes are positive for RNA polymerase 2 and H3K36me3 in  
138 the mouse thymus and expressed from hematopoietic stem cells all the way to thymic T  
139 cells (**Fig. 2E, Fig. S3A-B**).

140  
141 We then compared the mutational hotspots in *Mlh1*<sup>+/+</sup> and *Mlh1*<sup>-/-</sup> normal T cells (this  
142 study) and with those in *Mlh1*<sup>-/-</sup> T cell lymphomas (16). Only one shared mutational hotspot  
143 gene was found: *Ttn*, a massive gene with 324 exons, was mutated in both *Mlh1*<sup>-/-</sup> and  
144 *Mlh1*<sup>+/+</sup> single cell exomes (**Fig 2E**). We did not identify any mutations in *Ikzf1*, previously  
145 reported as a mutational target gene in *Mlh1*-deficient T cell lymphomas (16, 25).

146

147 Other identified hotspot genes (*Gm7361*, *Vps13c*, *Gm37013*, *Gm38667*, *Gm38666*) were  
148 mutated in both *Mlh1*<sup>-/-</sup> and *Mlh1*<sup>+/+</sup> T cells, and thus were not specific for *Mlh1*-deficiency.  
149 All except *Vps13c* were negative or inconclusive for the presence of H3K36me3 and RNA  
150 polymerase 2, suggesting that these genes are not transcribed in mouse thymus (**Fig. 2E**,  
151 **Fig. S3A**). *Gm37013*, *Gm38667* and *Gm38666* are predicted genes and they physically  
152 overlap with each other on chromosome 18 (**Fig. S3A**), which explains their identical  
153 mutational pattern.

154

### 155 **Insertions and deletions accumulate differently within repeats in *Mlh1*<sup>+/+</sup> and *Mlh1*<sup>-/-</sup>** 156 **T cells**

157 Next, we analyzed the size distribution of detected indels in single cell exomes. *Mlh1*<sup>+/+</sup>  
158 cells had more 1-nucleotide (nt) insertions than deletions, while this difference in *Mlh1*<sup>-/-</sup> T  
159 cells was evened out by increased 1-nt deletions (O.R = 1.794, 95% CI = 1.531-2.101, p =  
160 1.134x10<sup>-13</sup>, **Fig. 3A**). The same trend for 1-nt insertions as the dominant indel type in  
161 *Mlh1*<sup>+/+</sup> cells was observed in bulk T cell DNA samples from the same mice (**Fig. S4**).

162

163 We then analyzed the sequence context of the detected indels. As expected, most  
164 deletions in *Mlh1*<sup>-/-</sup> cells occurred at mononucleotide microsatellites, while in *Mlh1*<sup>+/+</sup> cells,  
165 most deletions were found in non-microsatellite sequences (**Fig. 3B**). When deletion  
166 counts were corrected for the number of base pairs of either microsatellite or non-  
167 microsatellite sequences, deletion frequencies were higher in microsatellites than in non-  
168 microsatellite sequences, regardless of MMR status (**Fig. 3C**). This underscores the well-  
169 documented intrinsic propensity of microsatellites to slippage during replication. As  
170 expected, *Mlh1*<sup>-/-</sup> cells had significantly higher deletion frequencies in microsatellite  
171 sequences compared to *Mlh1*<sup>+/+</sup> cells (p = 9.505x10<sup>-13</sup>, **Fig. 3C, Table S1**). Insertion

172 frequencies within repeats were more similar between *Mlh1*<sup>-/-</sup> and *Mlh1*<sup>+/+</sup> T cells, occurring  
173 especially in mononucleotide repeats (**Fig. 3D**). *Mlh1*<sup>-/-</sup> cells had slightly higher insertion  
174 frequencies in the context of microsatellite sequences (p =0.039, **Fig. 3E, Table S1**).

175

### 176 **Exons show a decreased burden of MMR-dependent mutations**

177 Exome sequencing, despite its name, not only captures exons, but also exon-adjacent,  
178 non-coding regions (**Fig. 1**) (26). This enabled us to ask whether *de novo* mutations  
179 accumulate differently in these two functionally distinct genic regions (exonic versus non-  
180 coding) in *Mlh1*<sup>-/-</sup> and *Mlh1*<sup>+/+</sup> cells.

181

182 No significant difference in SNV frequencies or insertions was observed in either exonic or  
183 non-coding regions in *Mlh1*<sup>-/-</sup> cells compared to *Mlh1*<sup>+/+</sup> cells (**Fig. 4A-B**). In contrast,  
184 deletions frequencies increased in *Mlh1*<sup>-/-</sup> cells in non-coding regions compared to *Mlh1*<sup>+/+</sup>  
185 cells (p = 9.94x10<sup>-5</sup>, **Fig. 4C, Table S1**). Exonic deletion frequencies in *Mlh1*<sup>-/-</sup> cells did not  
186 differ from those observed in *Mlh1*<sup>+/+</sup> cells (**Fig. 4C**), indicating that in the absence of  
187 functional MMR, the integrity of coding regions is still maintained, likely by purifying  
188 selection, as for MMR-deficient tumors by Kim et al., 2013. In conclusion, MMR-dependent  
189 mutations increased more in non-coding regions adjacent to exons, as compared to exons  
190 themselves.

191

### 192 **H3K36me3-enriched regions are depleted of MMR-dependent mutations**

193 Results from large tumor data sets strongly indicate that exons have a decreased mutation  
194 burden due to H3K36me3-mediated MMR (10), but evidence of this in normal cells and  
195 tissues *in vivo* is still lacking. To assess whether replication errors in transcribed genes are  
196 buffered by MMR by virtue of their H3K36me3 enrichment, we first analyzed H3K36me3



197 abundance in RNA polymerase 2 (RNAPol2)-positive (RNAPol2<sup>+</sup>) and -negative (RNAPol2<sup>-</sup>)  
198 ) genes in thymus using publicly available ChIP-seq data (27, 28). Presence of RNA  
199 polymerase 2 in the promoter region is a strong indicator of transcriptional activity (29).  
200 H3K36me3 levels in RNAPol2<sup>+</sup> regions were higher than in RNAPol2<sup>-</sup> regions and peaked  
201 at the centers of these regions (**Fig. 5A**), confirming that H3K36me3 is associated with  
202 transcriptional activity also in mouse thymus. However, not all RNAPol2<sup>+</sup> genes were  
203 positive for H3K36me3. Approximately 65% of RNAPol2<sup>+</sup> genes were also positive for  
204 H3K36me3, whereas 80% of H3K36me3 positive (H3K36me3<sup>+</sup>) genes were positive for  
205 RNAPol2 (**Fig. 5B**).

206

207 We analyzed how small deletions (that is, MMR-dependent mutations) were distributed to  
208 exons and non-coding regions based on either RNAPol2 or H3K36me3 status of genes.  
209 The proportion of exonic deletions over non-coding deletions was decreased in  
210 H3K36me3<sup>+</sup> genes compared to H3K36me3-negative (H3K36me3<sup>-</sup>) genes in *Mlh1*<sup>+/+</sup> ( $p =$   
211  $0.018$ , OR = 0.44, 95% CI = 0.198-0.906), but not in *Mlh1*<sup>-/-</sup> T cells ( $p = 1$ , OR = 0.972,  
212 95% CI = 0.542-1.694, **Fig. 5C**). Lower exonic deletion burden in RNAPol2<sup>+</sup> genes was  
213 also observed in *Mlh1*<sup>+/+</sup> cells (**Fig. 5D**), similar to H3K36me3<sup>+</sup> genes ( $p = 0.062$ , OR =  
214  $0.528$ , 95% CI = 0.250-1.060, **Fig. 5C**). The similar trends are not surprising, given the  
215 overlap between RNAPol2<sup>+</sup> and H3K36me3<sup>+</sup> genes (**Fig. 5B**). These results strongly  
216 support H3K36me3-guided, MMR-dependent protection of exons against genetic  
217 alterations.

218

219 The H3K36me3 mark is less abundant in 5' exons, compared to 3' exons of genes (6, 10).  
220 To test whether local H3K36me3 levels affect the intra-genic distribution of mutations  
221 within genes, we compared deletion frequencies in 1<sup>st</sup> and 2<sup>nd</sup> exons (from here on

222 referred to as 5' exons) with those in 3<sup>rd</sup> to last exons (from here on referred to as 3'  
223 exons), both in RNAPol2<sup>+</sup> and RNAPol2<sup>-</sup> genes. In RNAPol2<sup>+</sup> genes, H3K36me3 signal  
224 increased in 3' exons compared to 5' exons ( $d = 0.335$ , **Fig. 5E**), whereas in RNAPol2<sup>-</sup>  
225 genes, there was no difference in H3K36me3 levels between 3' and 5' exons ( $d = 0.002$ ,  
226 **Fig. 5F, Table S1**). In RNAPol2<sup>+</sup> genes, *Mlh1*<sup>-/-</sup> cells had higher deletion frequencies in 3'  
227 exons (high in H3K36me3) compared to *Mlh1*<sup>+/+</sup> cells ( $p = 4.57 \times 10^{-5}$ , **Fig. 5E, Table S1**). In  
228 5' exons (low in H3K36me3), the difference in deletion frequencies between *Mlh1*<sup>-/-</sup> and  
229 *Mlh1*<sup>+/+</sup> was smaller, yet significant ( $p = 0.016$ , **Fig. 5E, Table S1**). *Mlh1*<sup>+/+</sup> cells also had  
230 somewhat increased deletion frequencies in the 3' exons compared to 5' exons ( $p = 0.020$ ,  
231 **Fig. 5E, Table S1**). Sequencing coverage was similar between samples with or without  
232 mutations in the analyzed exons, except in the 5' exons in RNAPol2<sup>+</sup> regions in *Mlh1*<sup>+/+</sup>  
233 cells ( $p = 0.04$ , **Fig. S5**). Taken together, these results suggest that 3' exons in  
234 transcriptionally active genes are more prone to acquiring mutations compared to 5'  
235 exons, and that this effect is tempered by H3K36me3-guided MMR. No difference was  
236 observed in the deletion frequencies between *Mlh1*<sup>+/+</sup> and *Mlh1*<sup>-/-</sup> cells in the RNAPol2<sup>-</sup>  
237 genes in 5' exons ( $p = 0.539$ ) or 3' exons ( $p = 0.296$ , **Fig. 5F, Table S1**). *Mlh1*<sup>-/-</sup> cells,  
238 however, showed a small difference between deletion frequencies in 5' exons and 3'  
239 exons ( $p = 0.049$ , **Fig. 5F, Table S1**). H3K36me3<sup>-</sup> exons in RNAPol2<sup>-</sup> genes accumulated  
240 mutations in similar frequencies in both *Mlh1*<sup>+/+</sup> and *Mlh1*<sup>-/-</sup> cells. We interpret this to mean  
241 that the MMR machinery does not operate efficiently in these regions even in wildtype  
242 cells. RNAPol2<sup>+</sup>, but not RNAPol2<sup>-</sup> genes showed genotype-dependent spatial variability in  
243 deletion frequencies, thus transcriptional activity appears to affect accumulation and/or  
244 repair of replication errors.

245

## 246 DISCUSSION

247 Using single-cell exome sequencing of mouse thymic T cells, we uncovered how the  
248 exome-wide mutational landscape is shaped *in vivo* by replication errors and by MMR-  
249 mediated error correction. We further provide evidence for transcription-associated  
250 replication errors and H3K36me3-guided MMR at 3' exons of genes.

251

252 We show that scWES is a sensitive approach for unraveling signatures of replication errors  
253 and MMR activity. This is highlighted by the fact that we detected a substantial increase of  
254 deletions in *Mlh1*<sup>-/-</sup> T cells, and found evidence of insertional bias in *Mlh1*<sup>+/+</sup> T cells.

255 DNA polymerases tend to create more deletions than insertions, especially in  
256 repeat sequences (30-35). In the absence of MMR (which is the situation in *Mlh1*<sup>-/-</sup> cells),  
257 one would expect to directly detect replication errors. Indeed, we observed a significant  
258 increase of small deletions in *Mlh1*<sup>-/-</sup> cells compared to *Mlh1*<sup>+/+</sup> cells, as expected given the  
259 deletion bias of DNA polymerases. Taken together, we conclude that deletions reliably  
260 report of the replication errors that would otherwise be repaired by MMR.

261 In addition, we found that *Mlh1*<sup>+/+</sup> cells had more insertions than deletions. Increase  
262 in 1-nt insertions rather than deletions in *Mlh1*<sup>+/+</sup> cells has also been observed at unstable  
263 microsatellite loci in other MMR-proficient normal mouse tissues (36). Our findings are in  
264 line with the previously reported bias for MMR to correct deletions more efficiently than  
265 insertions, thereby creating an insertional bias at microsatellites (37).

266

267 *Mlh1*-deficient cells lack MMR activity and accumulate replication-induced errors with  
268 every cell division. Developing lymphocytes are particularly susceptible to replication  
269 errors because they undergo multiple rounds of proliferative expansions during  
270 development and maturation. Comparison of mutational frequencies in *Mlh1*<sup>-/-</sup> versus  
271 *Mlh1*<sup>+/+</sup> T cell exomes revealed two hotspots for replication errors, *Huwe1* and *Mcm7*

272 genes. Because these genes appear vulnerable for replication errors, we propose, that  
273 over time, in *Mlh1*-deficient cells damaging mutations will likely emerge. Indeed, mutations  
274 in *Huwe1* and *Mcm7* have been reported in a subset of *Mlh1*-deficient murine T cell  
275 lymphomas (16). The propensity of *Mcm7*, coding for an integral component of the  
276 replication machinery, to acquire deleterious mutations in MMR-deficient cells (**Figure 2E**)  
277 conceivably can accelerate the accumulation of replication-associated errors, thereby  
278 adding insult to injury.

279

280 Both *Huwe1* and *Mcm7* are expressed in the T lymphocyte lineage and required for  
281 lymphocyte development. Shielding them from permanent mutations is likely important for  
282 cellular homeostasis and normal development, and *Huwe1* and *Mcm7* were in fact devoid  
283 of mutations in *Mlh1*<sup>+/+</sup> T cells. In the face of frequent replication errors, how is efficient  
284 targeting of MMR to these regions ensured in wildtype cells? Both *Huwe1* and *Mcm7* were  
285 enriched for H3K36me3 in the mouse thymus, and H3K36me3-mediated MMR has been  
286 shown to protect actively transcribed genes (11). Thus, H3K36me3-mediated recruitment  
287 of MMR machinery to these genes provides an explanation for efficient error correction in  
288 wildtype cells; in the absence of MMR, H3K36me3 no longer has a protective effect.

289

290 Also, on a single cell resolution, the protective effect of H3K36me3-mediated MMR on  
291 active genes appears to hold true more globally. On the whole-exome level, MMR-  
292 dependent mutation frequencies in wildtype cells were lower especially in H3K36me3-  
293 enriched exons when compared to *Mlh1*<sup>-/-</sup> cells. Our results indicate that H3K36me3-  
294 mediated MMR conserves the integrity of active genes in normal tissues *in vivo*, similarly  
295 as shown previously for tumors and cell lines (8, 10, 11).

296

297 Moreover, we show evidence that 3' ends of actively transcribed genes are more prone to  
298 replication-associated errors and that more efficient recruitment of MMR via H3K36me3  
299 protects these regions and ensures that most of these errors do not become permanent  
300 mutations. Head-on collisions of the replication and transcription machineries can cause  
301 indels and base-substitutions, and especially increase the deletion burden within 3' ends  
302 (and to a lesser degree 5' ends) of genes under active transcription (38). Moreover, SNVs  
303 accumulate more to 3' UTRs than to 5' UTRs in aging B lymphocytes (19), supporting the  
304 observation that 3' regions are in fact more prone to mutations. Efficient recruitment of the  
305 MMR machinery via H3K36me3 can shield against replication-induced errors specifically in  
306 transcribed genes, whose integrity is particularly important.

307

## 308 **CONCLUSIONS**

309 Here, we delineate the mutational landscape of T cells shaped by the status of DNA repair  
310 (functional vs impaired), dissected at the single-cell level in the context of H3K36me3. We  
311 provide evidence that in normal T cells, MMR preferentially protects genes, and in  
312 particular H3K36me3-positive 3' exons transcribed in T cell lineage, against accumulation  
313 of *de novo* mutations. Taken together, our results suggest an attractive concept of thrifty  
314 MMR targeting, where genes critical for the development of a given cell type and under  
315 mutational stress due to active transcription are preferentially shielded from deleterious  
316 mutations.

317

## 318 **MATERIALS AND METHODS**

### 319 **Mice**

320 Two female *Mlh1*<sup>-/-</sup> (13) and two of their *Mlh1*<sup>+/+</sup> female littermates, age 12 weeks, were  
321 used for the single-cell whole exome sequencing study.

322

### 323 **Enrichment of thymic T cells**

324 Mice were euthanized by carbon dioxide inhalation, followed by cervical dislocation. Thymi  
325 were collected in ice-cold DMEM (Gibco cat: 11960-044) and visually inspected for any  
326 macroscopic anomalies. Whole thymi were homogenized for an enrichment of naïve T  
327 cells using a commercially available kit according to manufacturer's instructions  
328 (Invitrogen, cat:11413D).

329

### 330 **Single-cell capture and whole genome amplification**

331 Enriched T cells were prepared for single-cell capture and whole-genome amplification in  
332 Fluidigm C1 system according to manufacturer's protocol (Fluidigm cat: 100-7357). Single  
333 T cells were captured using an IFC 5-10  $\mu$ m capture plate (Fluidigm cat: 100-5762) and  
334 imaged using Nikon Eclipse Ti-E microscope with Hamamatsu Flash 4.0 V2 scientific  
335 CMOS detector. After confirming the capture by microscopy, cell lysis and whole-genome  
336 amplification steps were carried out in Fluidigm C1 system using illustra GenomiPhi V2  
337 DNA Amplification Kit (GE Healthcare Life Sciences cat: 25-6600-30). DNA concentrations  
338 of amplified single-cell genomes were determined using either a Qubit dsDNA HS Assay  
339 kit (Invitrogen cat:Q32854) with Qubit Fluorometer (1.27) or QuantiFluor dsDNA System  
340 (Promega cat:E2670) with Quantus Fluorometer (2.24). Fragment size and integrity of  
341 amplified single-cell genomes were analyzed using Bioanalyzer High Sensitivity DNA  
342 Assay (Agilent) with Agilent Bioanalyzer 2100 (2100 Expert B.02.08.S648 SR3) or  
343 TapeStation Genomic DNA ScreenTape (Agilent) with TapeStation 4200 (TapeStation  
344 Analysis Software A.02.021 SR1) at the Biomedicum Functional Genomics Unit, Helsinki.  
345 Samples with the highest density of fragments around ~10 kb were chosen for sequencing  
346 based on visual inspection of the fragment size distributions.

347

## 348 **Library preparation and sequencing**

349 Agilent SureSelectXT Mouse All Exon 49.6Mb capture was used for exome enrichment  
350 and to prepare multiplexed libraries for Illumina. Samples were sequenced using Illumina  
351 NextSeq 500 with mid output reagents as paired-end 150 bp reads. In total, we sequenced  
352 56 single T cell exomes in three batches, each batch consisting of single-cell samples with  
353 a genotype-matched bulk DNA sample (= whole genome amplified cell suspension,  
354 n=3/genotype, biological replicates 1 and 2, and technical replicate for biological replicate  
355 1). Sequencing was performed by the Biomedicum Functional Genomics Unit, Helsinki.

356

## 357 **Sequence alignment**

358 Sequence alignment and variant calling workflow was adapted from Leung et al. (39).  
359 Paired-end reads were aligned to the Dec. 2011 (GRCm38/mm10) assembly of the mouse  
360 genome using bowtie2 (2.3.4) (40) with --local mode. Aligned reads were then sorted,  
361 merged, and marked for duplicates using SAMtools (1.4) (41) and Picard (2.13.2) (42).  
362 Reads were re-aligned around indels using GATK (3.8-0-ge9d806836) (43), followed by  
363 removal of reads with low mapping quality (MQ < 40) using SAMtools. Sequencing metrics  
364 (average depth and coverage) were calculated using SAMtools, BEDtools (2.26.0) (44)  
365 and R (3.5.0). Samples that had coverage less than 50% at depth  $\geq 1X$  were excluded from  
366 subsequent analyses (**Fig. S1B**).

367

## 368 **Variant calling and filtering**

369 Variants within the exome capture region + 100 bp interval padding were called using  
370 GATK HaplotypeCaller in -ERC GVCF mode, followed by joint calling with  
371 GenotypeGVCFs. Samples (single-cell and bulk DNA) from the same genotype (*Mih1*<sup>+/+</sup> or

372 *Mlh1*<sup>-/-</sup>) were analyzed together. Variant score recalibration was done separately to indels  
373 and SNVs using GATK SelectVariants and VariantRecalibration and applied at 99.0  
374 sensitivity level using ApplyRecalibration. Variant sets used to build the recalibration model  
375 for SNVs were dbSNP (build 150) (45), Mouse Genomes Project SNP Release Version 5  
376 (46), and bulk SNV set (see below), and for indels, dbSNP (build 150), Mouse Genomes  
377 Project indel Release Version 5, and bulk indel set (see below). After variant score  
378 recalibration, all variants that had genotype quality <20, depth <6 and heterozygous  
379 genotypes allelic depth <0.333 were filtered out. Clustered SNVs (>3 SNVs / 10 bp) were  
380 filtered out to eliminate false positive SNVs caused by poor alignment around indels.  
381 Variants found in both *Mlh1*<sup>+/+</sup> and *Mlh1*<sup>-/-</sup> samples (germline mutations), homozygous  
382 mutations (insufficient whole-genome amplification) and variants found in the 129P2  
383 OlaHsd strain were excluded from all subsequent analyses (mice with disrupted *Mlh1* were  
384 originally created using 129/Ola derived embryonic stem cells that were injected to  
385 C57BL/6 mice (13)). Filtering was done using GATK VariantFiltration, Picard FilterVcf, and  
386 R package *VariantAnnotation* (1.26.1) (47).

### 387 388 **High confidence bulk indel and SNV training set construction**

389 High confidence bulk DNA SNV and indel training sets for variant score recalibration were  
390 constructed from the raw variants discovered in bulk DNA samples (both *Mlh1*<sup>+/+</sup> and *Mlh1*<sup>-/-</sup>  
391 <sup>^</sup>) by including the variants that passed the following filters: ReadPosRankSum > -1.9, QD  
392 > 5.0, SOR > 1.5 for indels and SNVs, and for SNVs only: MQRankSum > -1.9. Variants  
393 that did not have a genotype (= insufficient sequencing coverage) across all bulk samples  
394 (n=3/genotype) were removed from the reference bulk set.

### 395 396 **Mutation annotation**



397 Mutations were annotated (gene, genic location, mutation consequence) using R package  
398 *VariantAnnotation* function *locateVariants* with *AllVariants* option and *predictCoding*. The  
399 UCSC KnownGene track from *TxDb.Mmusculus.UCSC.mm10.knownGene* (3.4.0) was  
400 used as the gene model. We considered mutations that fall within CDS regions to be  
401 exonic, and those that fall within 5' untranslated region (UTR), 3' UTR, splice site, intron or  
402 promoter to be non-coding. For analysis of exonic and non-coding indels (**Fig. 4A-C** and  
403 **Fig. 5C-D**), we included mutations in genes with only one transcript to avoid having  
404 multiple locations within one gene for one mutation. In the mutation hotspot analysis (**Fig.**  
405 **2E**), all possible transcript variants were analyzed.

406

407 **Regions with transcriptional activity and enriched with H3K36me3 in mouse exome**  
408 RNAPol2 (ENCFF119XEH) and H3K36me3 (ENCFF853BYO) ChIP-seq peak coordinates  
409 for mouse thymus were downloaded as BED files from ENCODE (27, 28). We used UCSC  
410 knownGene track to define the genomic coordinates of genes. Genes that overlapped or  
411 were within 100 bp of the ChIP-seq peak coordinates were defined positive for that  
412 feature. Genes positive for H3K36me3 or RNAPol2 peaks were defined separately.

413

#### 414 **H3K36me3 signal in genes**

415 H3K36me3 data (ENCFF287DIJ) for mouse thymus was downloaded as a BigWig file  
416 containing fold-change (FC) of ChIP reads over background reads from ENCODE (27, 28).  
417 Mean H3K36me3 FC  $\pm$  standard deviation (s.d.) in each position (meaning, each *base*  
418 gets a mean H3K36me3 FC value) 500 bases up- and downstream from the exome  
419 capture centers was calculated for RNAPol2-positive and -negative genes. Mean  
420 H3K36me3 FC  $\pm$  s.d. in 5' and 3' exons (meaning, each *region* gets a mean H3K36me3  
421 FC value) were calculated for RNAPol2-positive and -negative genes.

422

### 423 **Microsatellites in mouse exome**

424 Mono-, di-, and trinucleotide repeats in mouse exome were detected using STR-FM  
425 (Galaxy version 1.0.0) (48) in Galaxy at usegalaxy.org (49). R package  
426 *BSgenome.Mmusculus.UCSC.mm10* (1.4.0) was used to convert BED file containing  
427 genomic coordinates of variant call regions into FASTA format. Mono-, di-, and  
428 trinucleotide repeats were detected from the FASTA file in separate runs using motif sizes  
429 1, 2, and 3, no partial motifs allowed, and minimum repeat unit counts were 4 (minimum  
430 length 4 bp) in mononucleotide repeat detection and 3 in dinucleotide (minimum length 6  
431 bp) and trinucleotide (minimum length 9 bp) repeat detections. Non-microsatellite  
432 associated regions were defined as those that were not defined as mono-, di- nor  
433 trinucleotide repeats.

434

### 435 **Microsatellite associated indels in single-cells**

436 Sequence 100 bp up- and downstream of detected indel start coordinates were extracted  
437 from the mouse reference genome mm10 (*BSgenome.Mmusculus.UCSC.mm10*) in  
438 FASTA format and analyzed for mono-, di- and trinucleotide repeats as described above.  
439 Indels were marked microsatellite-associated if the indel start coordinate and microsatellite  
440 start coordinate were the same. Indels found not to be within mono-, di- or trinucleotide  
441 repeat were labelled as non-microsatellite associated (random) indels.

442

### 443 **Mutation frequencies in single T cells**

444 Global indel and SNV frequencies in the variant call region were calculated for each  
445 single-cell and reported as mutations/base. Mutation frequency was calculated as:  $frq =$   
446  $n/(cov*2)$ , where  $n$  is the number of mutations,  $cov$  is the number of high-quality base pairs

447 (MQ > 40, DP > 6). Similarly, frequencies in different genomic regions (exonic, non-coding,  
448 microsatellites, 3' exons, 5' exons) were calculated by first counting the number of  
449 mutations in each region and dividing it by the coverage of that particular region.

450

#### 451 **Mutation frequencies in 1 Mb windows**

452 Local mutation frequencies in 1 Mb windows were calculated by first dividing the genome  
453 into 1 Mb windows, then calculating the coverage of variant call region (exome capture +  
454 100 bp padding) in each window. Next, the number of SNVs, deletions, and insertions per  
455 genotype (*Mlh1*<sup>+/+</sup> or *Mlh1*<sup>-/-</sup>) was counted in each window. Mutation frequency for *Mlh1*<sup>+/+</sup>  
456 and *Mlh1*<sup>-/-</sup> groups was then calculated by dividing the number of observed mutations in  
457 each window by the coverage (*cov*\*2) of variant call region in that window.

458

#### 459 **Mutation hotspot analysis**

460 We analyzed all genes for mutations in *Mlh1*<sup>+/+</sup> and *Mlh1*<sup>-/-</sup> T cells. For each sample, we  
461 counted the number of mutations per gene. These numbers were then normalized by the  
462 coverage (*cov*\*2) of the gene in each sample. A gene was considered to be a hotspot if it  
463 was mutated in more than 5 *Mlh1*<sup>-/-</sup> T cells.

464

#### 465 **Outlier cells in single-cell samples**

466 Cells that had indel or SNV frequency higher or lower than 1.5 \* interquartile range in  
467 matching genotype were labelled as outliers and removed from all the subsequent  
468 statistical test. Outliers are shown in the plots, unless mentioned otherwise, and indicated  
469 in **Figs. 2B, 3B and 3D**.

470

#### 471 **MMR dependent mutation frequencies in 5' and 3' exons**

472 To analyze mutation frequencies and H3K36me3 signal in 5' exons (1<sup>st</sup> to 2<sup>nd</sup> exons) and  
473 3' exons (3<sup>rd</sup> to last exons), we took UCSC knownGene transcripts, excluded genes that  
474 overlap each other, and collapsed transcripts gene-wise to create one exon-intron-  
475 structure for each gene. 100 bp padding was added to each exon. Only genes with 4 or  
476 more exons were considered and exons 1-2 were marked as 5' exons and exons 3-last  
477 were marked as 3' exons. Genes that were in or within 100 bp of RNAPol2 peak  
478 coordinates were marked as RNAPol2 positive. Number of deletions in 5' and 3' exons in  
479 each single-cell were counted and then divided by the coverage ( $cov*2$ ) of either 3' or 5'  
480 exons in that single-cell sample.

481

## 482 **General R packages**

483 R version 3.5.0 was used to analyze the data. *VariantAnnotation* package was used for  
484 VCF file manipulation, *rtracklayer* (1.40.3) (50) package for reading BED and BigWig files,  
485 and *GenomicRanges* (1.32.6) (51) package for handling genomic coordinates in R  
486 environment. Figures and general data manipulation were done using *ggplot2* (3.00.0),  
487 *gplots* (3.00.1), *Gviz* (1.24.0), *grid* (3.5.0), *viridis* (0.5.1), *dplyr* (0.7.6), *plyr* (1.8.4),  
488 *reshape2* (1.4.3), *tidyr* (0.8.2), *VennDiagram* (1.6.20), and *Hmisc* (4.1-1).

489

## 490 **Statistical analysis**

491 All tests were calculated using 22 *Mlh1*<sup>-/-</sup> T cells and 19 *Mlh1*<sup>+/+</sup> T cells, except in the **Fig.**  
492 **2A**, where all single cell samples were included (22 *Mlh1*<sup>-/-</sup> T cells and 22 *Mlh1*<sup>+/+</sup> T cells).  
493 All mutation frequencies are reported as median (mdn) and interquartile range (iqr) (**Table**  
494 **S1**) and tested using two-tailed Mann-Whitney U test (*wilcox.test*). P-values for mutation  
495 counts (indels and SNVs (**Fig. 2A**), 1-nt indels in *Mlh1*<sup>+/+</sup> and *Mlh1*<sup>-/-</sup> cells (**Fig. 3A**),  
496 mutations in exonic vs non-coding regions in active and silent genes (**Fig. 5C-D**)) were

497 calculated using two-tailed Fisher's exact test (*fisher.test*) and reported with odds ratio  
498 (O.R., ratio of ratios) and 95% confidence intervals (CI). O.R. values close to 1 indicate no  
499 difference in the ratios. Differences were determined statistically significant at a confidence  
500 level of 95%. Errors bars shown in **Fig. 3A** are Sison and Glaz 95% multinomial  
501 confidence intervals from R package *DescTools* (0.99.25). Effect size reported for  
502 H3K36me3 signal in **Fig. 5E-F** was calculated using Cohen's d with Bessel's correction,  
503 implemented in R. Cohen's d values closer to 0 indicate smaller difference between two  
504 group means

505

## 506 **DECLARATIONS**

507

### 508 **Ethics approval and consent to participate**

509 All animal experiments were performed following national and institutional guidelines (the  
510 National Animal Experiment Board in Finland and the Laboratory Animal Centre of the  
511 University of Helsinki) under animal license number ESAVI/1253/04.10.07/2016.

512

### 513 **Consent for publication**

514 Not applicable.

515

### 516 **Availability of data and materials**

517 Single-cell exome sequencing data generated and analyzed during the current study are  
518 available as raw reads in FASTQ format in the SRA repository, under accession number  
519 [PRJNA575619](https://www.ncbi.nlm.nih.gov/sra/PRJNA575619). Publicly available H3K36me3 ([ENCF853BYO](https://www.encodeproject.org/ENCF853BYO) and [ENCF287DIJ](https://www.encodeproject.org/ENCF287DIJ)) and  
520 RNAPol2 ([ENCF119XEH](https://www.encodeproject.org/ENCF119XEH)) ChIPSeq data can be found from ENCODE  
521 (<https://www.encodeproject.org>) database.

522

523 **Competing interest**

524 The authors declare that they have no competing interests.

525

526 **Funding**

527 E.A. is supported by a funded position in the Doctoral Program in Integrative Life  
528 Sciences, Doctoral School of Health, University of Helsinki, and ASLA-Fulbright Pre-  
529 Doctoral Fellowship 2018-2019. This work was supported by the Academy of Finland  
530 (grants 263870, 292789, 256996, 306026 to L.K.), the Sigrid Juséliuksen Säätiö (to L.K.)  
531 and Emil Aaltonen Säätiö (to E.A.).

532

533 **Authors' contributions**

534 E.A. performed and designed the experiments, performed data analysis, interpreted the  
535 results and wrote the manuscript. D.D. designed and performed initial experiments,  
536 supervised data analysis and interpretation, and wrote the manuscript. L.K. conceived and  
537 designed the study, supervised the experiments, data analysis and interpretation, acquired  
538 funding, coordinated the project and wrote the manuscript. All authors read and approved  
539 the manuscript.

540

541 **Acknowledgements**

542 We are grateful to Fran Supek, Esa Pitkänen, Niko Välimäki and Julia Casado for  
543 discussions and advice. We wish to acknowledge CSC – IT Center for Science, Finland for  
544 computing resources, the Functional Genomics Unit (University of Helsinki) for sequencing  
545 services, Minna Nyström (University of Helsinki) for providing mice, Jussi Taipale and  
546 Anna Vähärautio for access to Fluidigm C1 system, and Kul Shanker Shrestha and Minna

547 Tuominen for technical assistance. Assistance was also provided by Laboratory Animal  
548 Center, and Biomedicum Imaging Unit at University of Helsinki and Palo Alto Veterans  
549 Institute for Research (PAVIR) FACS Core.

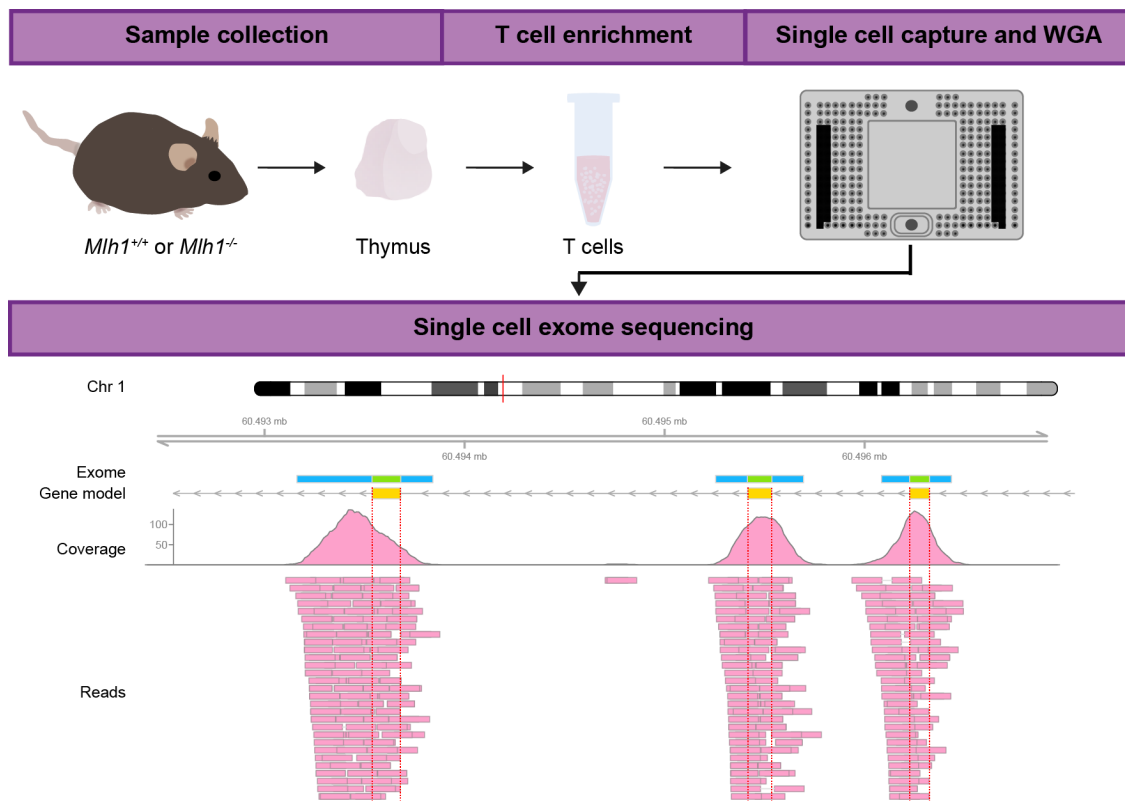

550

### 551 **Figure 1. Whole exome sequencing of single T cells: Experimental overview**

552 Thymi of *Mlh1*<sup>-/-</sup> and *Mlh1*<sup>+/+</sup> mice were dissected and used for enrichment of naïve T cells,  
553 followed by single-cell capture, cell lysis, and whole genome amplification in a Fluidigm  
554 C1. Amplified genomes were used for whole exome sequencing (WES) and sequencing  
555 reads were analyzed for genetic variants. Shown is a read pileup and coverage of sample  
556 WT1-C26 in a ~5-kb long region on chromosome 1 that contains three exons of *Raph1*. In  
557 addition to exons (green bar in exome panel), WES also partially covers non-coding  
558 regions adjacent to exons (blue bar in exome panel), enabling the comparison of mutation  
559 frequency between exonic and non-coding regions.

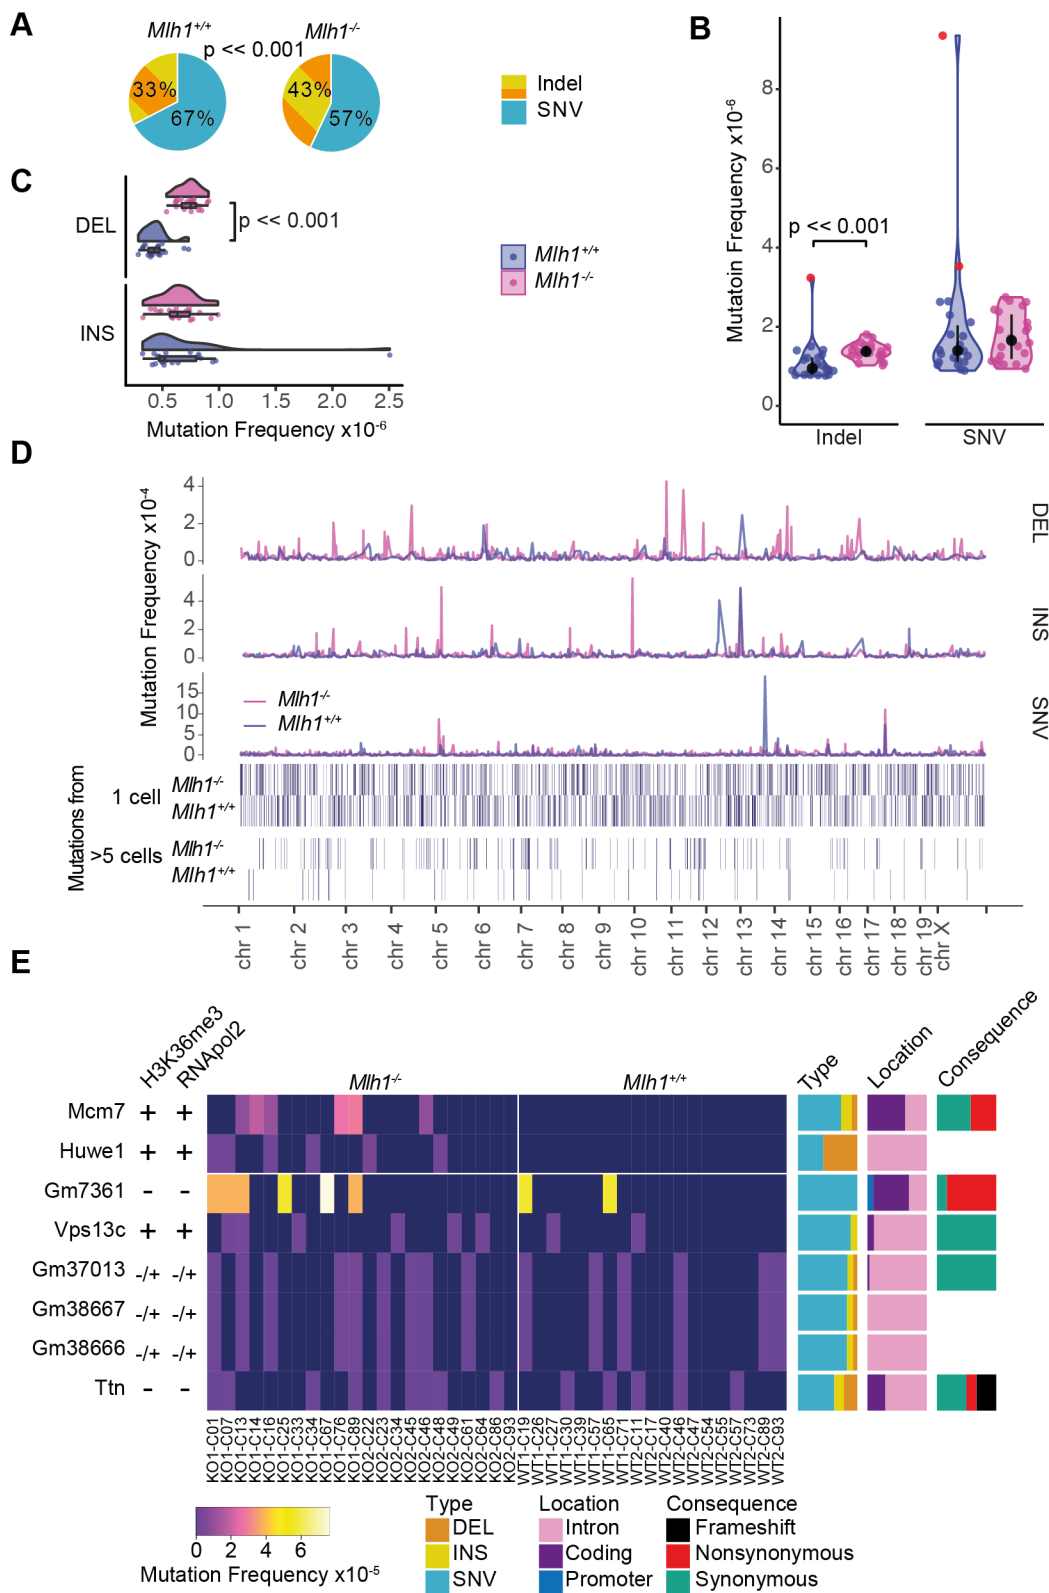



564 SNV frequencies together with median and interquartile range, and (C) deletion and  
565 insertion frequencies in *Mlh1*<sup>+/+</sup> and *Mlh1*<sup>-/-</sup> T cells. *Mlh1*<sup>-/-</sup> T cells have significantly higher  
566 indel, and especially deletion, frequencies than *Mlh1*<sup>+/+</sup> T cells ( $p \ll 0.001$ , two-tailed  
567 Mann-Whitney U-test). Outlier cells (see methods) are marked with red color in (B). (D)  
568 Local mutation frequencies in 1 Mb windows across mouse genome. *Mlh1*<sup>-/-</sup> T cells have  
569 multiple high local mutation peaks originating from only single T cell. (E) *Mcm7* and *Huwe1*  
570 are mutational hotspots in *Mlh1*<sup>-/-</sup> T cells. Columns are sorted by genotype and cell ID  
571 (outliers excluded), rows based on the average mutation frequency. *Mlh1*<sup>+/+</sup> cells have  
572 label WT and *Mlh1*<sup>-/-</sup> cells have label KO, biological replicates are marked with 1 and 2.  
573 Each cell has cell identifier that originates from the Fluidigm C1 plate capture site. Bar plots  
574 on the right show proportions of mutation types, locations, and consequences in genes.  
575 Left hand side columns show positivity or negativity for RNAPol2 and H3K36me3 peaks  
576 **(Fig. S3A).**

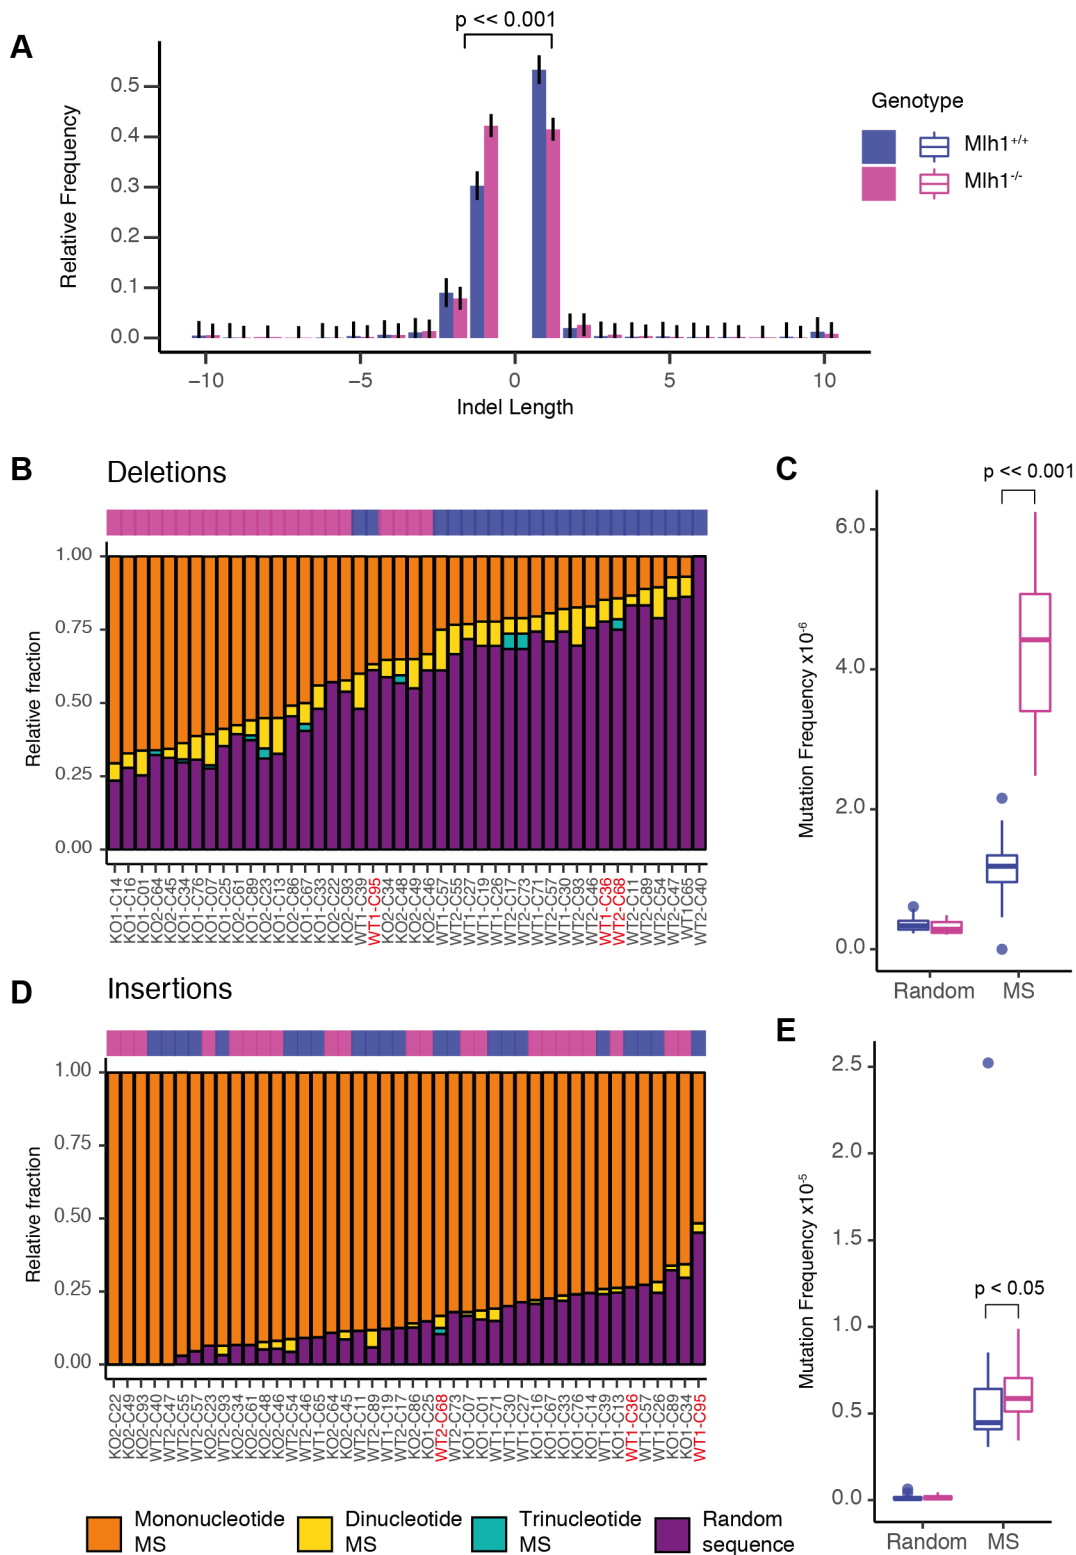

577

578 **Figure 3. Small deletions report on MMR dependent mutations in mouse T cells**

579 (A) Indel length distribution as relative frequencies with Sison and Glaz 95% multinomial

580 confidence intervals in *Mih1*<sup>+/+</sup> and *Mih1*<sup>-/-</sup> T cells. *Mih1*<sup>-/-</sup> and *Mih1*<sup>+/+</sup> cells have different

581 ratios of 1-nt indels ( $p << 0.001$ , two-tailed Fisher's exact test). Indels of length  $\geq 10$  bp are

582 binned together. (B) Relative and (C) normalized frequencies of deletions in microsatellites  
583 (MS) (mono-, di- and trinucleotide repeats) and in non-microsatellite (random) sequence in  
584 single-cell samples. (D) Relative and (E) normalized frequencies of insertions in  
585 microsatellites (mono-, di- and trinucleotide repeats) and in non-microsatellite (random)  
586 sequence in single-cell samples. Bar plots are ranked by descending mutation fraction  
587 within mononucleotide repeats. *Mlh1*<sup>-/-</sup> cells have a significantly higher deletion  
588 frequencies in microsatellites than *Mlh1*<sup>+/+</sup> ( $p < 0.001$ , two-tailed Mann-Whitney U-test).  
589 Mutation frequencies are shown as boxplots. Outliers (see methods) are labeled with red  
590 in (B) and (D).

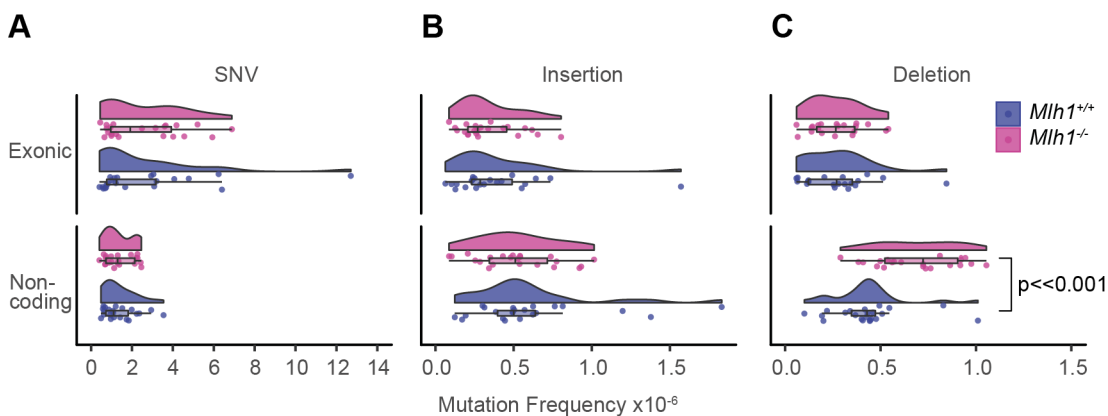

591

592 **Figure 4. *Mlh1*<sup>-/-</sup> cells accumulate mutations to non-coding regions of genome**

593 (A) SNV, (B) insertion and (C) deletion frequencies in exonic and non-coding (3' and 5'

594 UTRs, promoters, splice sites, introns) regions of the exome in *Mlh1*<sup>+/+</sup> and *Mlh1*<sup>-/-</sup> T cells.

595 *Mlh1*<sup>-/-</sup> T cells have significantly higher frequencies of non-coding deletions ( $p < 0.001$ ,

596 Two-tailed Mann-Whitney U-test).

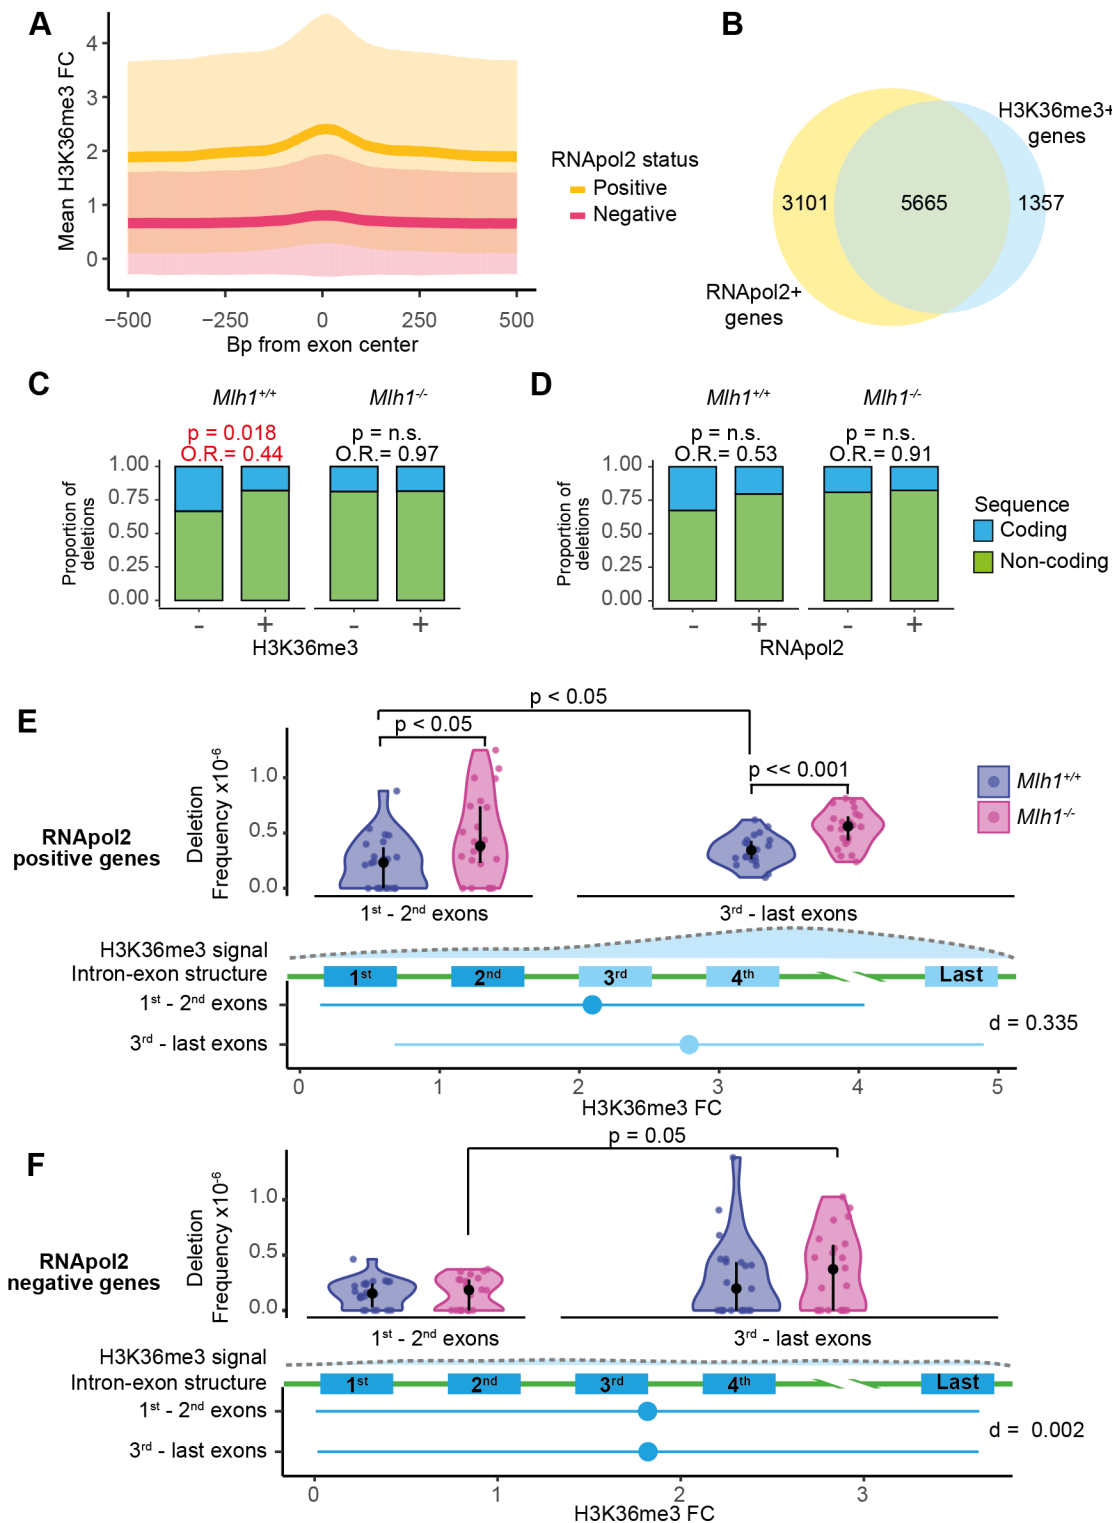

597

598 **Fig 5. H3K36me3 reduces the amount of MMR-dependent mutations in exons**

599 (A) H3K36me3 fold change (FC) (mean  $\pm$  s.d.) in 1000 bp window around of exon centers

600 in RNApol2 positive (+) and

601 H3K36me3 positive (+) gene counts. Proportions of small deletions and insertions in

602 genes positive or negative for (C) H3K36me3 and (D) RNAPol2. Coding regions in genes  
603 positive for H3K36me3 have less deletions relative to silent genes in *Mlh1<sup>+/+</sup>* cells ( $p =$   
604  $0.018$ , O.R. =  $0.44$ , two-tailed Fisher's exact test), but not in *Mlh1<sup>-/-</sup>* cells. Deletion  
605 frequencies in 1<sup>st</sup> to 2<sup>nd</sup> exons (5' exons) and 3<sup>rd</sup> to last exons (3' exons) in RNAPol2 (E)  
606 positive and (F) negative genes. In RNAPol2-positive genes, *Mlh1<sup>-/-</sup>* cells have higher  
607 deletion frequency especially in 3<sup>rd</sup> to last exons (high H3K36me3) than *Mlh1<sup>+/+</sup>* cells, and  
608 to lesser degree, in the 1<sup>st</sup> to 2<sup>nd</sup> exons (low H3K36me3). First panel shows the deletion  
609 frequencies together with median and interquartile range in *Mlh1<sup>+/+</sup>* and *Mlh1<sup>-/-</sup>* cells.  
610 Second panel shows a schematic of H3K36me3 enrichment along a gene. Third panel  
611 shows a schematic of a gene structure. Fourth panel shows H3K36me3 signal as mean  $\pm$   
612 s.d. of FC in 1<sup>st</sup> to 2<sup>nd</sup> exons and 3<sup>rd</sup> to last exons together with effect size as Cohen's  $d$   
613 with Bessel's correction. Deletion frequencies were tested using two-tailed Mann-Whitney  
614 U-test.

615

## 616 REFERENCES

617

- 618 1. St Charles JA, Liberti SE, Williams JS, Lujan SA, Kunkel TA. Quantifying the  
619 contributions of base selectivity, proofreading and mismatch repair to nuclear DNA  
620 replication in *Saccharomyces cerevisiae*. *DNA Repair (Amst)*. 2015;31:41-51.
- 621 2. Li GM. Mechanisms and functions of DNA mismatch repair. *Cell Res*.  
622 2008;18(1):85-98.
- 623 3. Lahue RS, Au KG, Modrich P. DNA mismatch correction in a defined system.  
624 *Science (New York, NY)*. 1989;245(4914):160-4.
- 625 4. Zhang Y, Yuan F, Presnell SR, Tian K, Gao Y, Tomkinson AE, et al. Reconstitution  
626 of 5'-directed human mismatch repair in a purified system. *Cell*. 2005;122(5):693-  
627 705.

- 628 5. Li F, Mao G, Tong D, Huang J, Gu L, Yang W, et al. The histone mark H3K36me3  
629 regulates human DNA mismatch repair through its interaction with MutSalpha. *Cell*.  
630 2013;153(3):590-600.
- 631 6. Kolasinska-Zwierz P, Down T, Latorre I, Liu T, Liu XS, Ahringer J. Differential  
632 chromatin marking of introns and expressed exons by H3K36me3. *Nat Genet*.  
633 2009;41(3):376-81.
- 634 7. Chantalat S, Depaux A, Hery P, Barral S, Thuret JY, Dimitrov S, et al. Histone H3  
635 trimethylation at lysine 36 is associated with constitutive and facultative  
636 heterochromatin. *Genome Res*. 2011;21(9):1426-37.
- 637 8. Supek F, Lehner B. Differential DNA mismatch repair underlies mutation rate  
638 variation across the human genome. *Nature*. 2015;521(7550):81-4.
- 639 9. Supek F, Lehner B. Clustered Mutation Signatures Reveal that Error-Prone DNA  
640 Repair Targets Mutations to Active Genes. *Cell*. 2017;170(3):534-47 e23.
- 641 10. Frigola J, Sabarinathan R, Mularoni L, Muinos F, Gonzalez-Perez A, Lopez-Bigas  
642 N. Reduced mutation rate in exons due to differential mismatch repair. *Nat Genet*.  
643 2017;49(12):1684-92.
- 644 11. Huang Y, Gu L, Li GM. H3K36me3-mediated mismatch repair preferentially protects  
645 actively transcribed genes from mutation. *J Biol Chem*. 2018;293(20):7811-23.
- 646 12. Baker SM, Plug AW, Prolla TA, Bronner CE, Harris AC, Yao X, et al. Involvement of  
647 mouse Mlh1 in DNA mismatch repair and meiotic crossing over. *Nat Genet*.  
648 1996;13(3):336-42.
- 649 13. Edelman W, Cohen PE, Kane M, Lau K, Morrow B, Bennett S, et al. Meiotic  
650 pachytene arrest in MLH1-deficient mice. *Cell*. 1996;85(7):1125-34.
- 651 14. Edelman W, Yang K, Kuraguchi M, Heyer J, Lia M, Kneitz B, et al. Tumorigenesis  
652 in Mlh1 and Mlh1Apc1638N mutant mice. *Cancer research*. 1999;59(6):1301-7.
- 653 15. Prolla TA, Baker SM, Harris AC, Tsao JL, Yao X, Bronner CE, et al. Tumour  
654 susceptibility and spontaneous mutation in mice deficient in Mlh1, Pms1 and Pms2  
655 DNA mismatch repair. *Nat Genet*. 1998;18(3):276-9.

- 656 16. Daino K, Ishikawa A, Suga T, Amasaki Y, Kodama Y, Shang Y, et al. Mutational  
657 landscape of T-cell lymphoma in mice lacking the DNA mismatch repair gene Mlh1:  
658 no synergism with ionizing radiation. *Carcinogenesis*. 2019;40(2):216-24.
- 659 17. Leung ML, Davis A, Gao R, Casasent A, Wang Y, Sei E, et al. Single-cell DNA  
660 sequencing reveals a late-dissemination model in metastatic colorectal cancer.  
661 *Genome Res*. 2017;27(8):1287-99.
- 662 18. Wu H, Zhang XY, Hu Z, Hou Q, Zhang H, Li Y, et al. Evolution and heterogeneity of  
663 non-hereditary colorectal cancer revealed by single-cell exome sequencing.  
664 *Oncogene*. 2017;36(20):2857-67.
- 665 19. Zhang L, Dong X, Lee M, Maslov AY, Wang T, Vijg J. Single-cell whole-genome  
666 sequencing reveals the functional landscape of somatic mutations in B lymphocytes  
667 across the human lifespan. *Proc Natl Acad Sci U S A*. 2019;116(18):9014-9.
- 668 20. Pellegrino M, Sciambi A, Treusch S, Durruthy-Durruthy R, Gokhale K, Jacob J, et  
669 al. High-throughput single-cell DNA sequencing of acute myeloid leukemia tumors  
670 with droplet microfluidics. *Genome Res*. 2018;28(9):1345-52.
- 671 21. Shah DK, Zuniga-Pflucker JC. An overview of the intrathymic intricacies of T cell  
672 development. *J Immunol*. 2014;192(9):4017-23.
- 673 22. Meier B, Volkova NV, Hong Y, Schofield P, Campbell PJ, Gerstung M, et al.  
674 Mutational signatures of DNA mismatch repair deficiency in *C. elegans* and human  
675 cancers. *Genome Res*. 2018;28(5):666-75.
- 676 23. King B, Boccalatte F, Moran-Crusio K, Wolf E, Wang J, Kayembe C, et al. The  
677 ubiquitin ligase Huwe1 regulates the maintenance and lymphoid commitment of  
678 hematopoietic stem cells. *Nat Immunol*. 2016;17(11):1312-21.
- 679 24. Deegan TD, Diffley JF. MCM: one ring to rule them all. *Curr Opin Struct Biol*.  
680 2016;37:145-51.
- 681 25. Kakinuma S, Kodama Y, Amasaki Y, Yi S, Tokairin Y, Arai M, et al. Ikaros is a  
682 mutational target for lymphomagenesis in Mlh1-deficient mice. *Oncogene*.  
683 2007;26(20):2945-9.

- 684 26. Guo Y, Long J, He J, Li Cl, Cai Q, Shu XO, et al. Exome sequencing generates  
685 high quality data in non-target regions. *BMC Genomics*. 2012;13:194.
- 686 27. Encode Project Consortium. An integrated encyclopedia of DNA elements in the  
687 human genome. *Nature*. 2012;489(7414):57-74.
- 688 28. Sloan CA, Chan ET, Davidson JM, Malladi VS, Strattan JS, Hitz BC, et al. ENCODE  
689 data at the ENCODE portal. *Nucleic Acids Res*. 2016;44(D1):D726-32.
- 690 29. Barski A, Cuddapah S, Cui K, Roh TY, Schones DE, Wang Z, et al. High-resolution  
691 profiling of histone methylations in the human genome. *Cell*. 2007;129(4):823-37.
- 692 30. Baptiste BA, Jacob KD, Eckert KA. Genetic evidence that both dNTP-stabilized and  
693 strand slippage mechanisms may dictate DNA polymerase errors within  
694 mononucleotide microsatellites. *DNA Repair (Amst)*. 2015;29:91-100.
- 695 31. Kunkel TA. Frameshift mutagenesis by eucaryotic DNA polymerases in vitro. *J Biol*  
696 *Chem*. 1986;261(29):13581-7.
- 697 32. Kim TM, Laird PW, Park PJ. The landscape of microsatellite instability in colorectal  
698 and endometrial cancer genomes. *Cell*. 2013;155(4):858-68.
- 699 33. Lujan SA, Clark AB, Kunkel TA. Differences in genome-wide repeat sequence  
700 instability conferred by proofreading and mismatch repair defects. *Nucleic Acids*  
701 *Res*. 2015;43(8):4067-74.
- 702 34. Woerner SM, Tosti E, Yuan YP, Kloor M, Bork P, Edelmann W, et al. Detection of  
703 coding microsatellite frameshift mutations in DNA mismatch repair-deficient mouse  
704 intestinal tumors. *Mol Carcinog*. 2015;54(11):1376-86.
- 705 35. Garcia-Diaz M, Kunkel TA. Mechanism of a genetic glissando: structural biology of  
706 indel mutations. *Trends Biochem Sci*. 2006;31(4):206-14.



- 707 36. Shrestha K, Tuominen M, Kauppi L. *Mlh1* haploinsufficiency induces microsatellite  
708 instability specifically in intestine. 2019 (doi:10.1101/652198).
- 709 37. Baptiste BA, Ananda G, Strubczewski N, Lutzkanin A, Khoo SJ, Srikanth A, et al.  
710 Mature microsatellites: mechanisms underlying dinucleotide microsatellite  
711 mutational biases in human cells. *G3* (Bethesda). 2013;3(3):451-63.
- 712 38. Sankar TS, Wastuwidyaningtyas BD, Dong Y, Lewis SA, Wang JD. The nature of  
713 mutations induced by replication-transcription collisions. *Nature*.  
714 2016;535(7610):178-81.
- 715 39. Leung ML, Wang Y, Kim C, Gao R, Jiang J, Sei E, et al. Highly multiplexed targeted  
716 DNA sequencing from single nuclei. *Nat Protoc*. 2016;11(2):214-35.
- 717 40. Langmead B, Salzberg SL. Fast gapped-read alignment with Bowtie 2. *Nature*  
718 *methods*. 2012;9(4):357-9.
- 719 41. Li H, Handsaker B, Wysoker A, Fennell T, Ruan J, Homer N, et al. The Sequence  
720 Alignment/Map format and SAMtools. *Bioinformatics*. 2009;25(16):2078-9.
- 721 42. Broad Institute [Available from: <http://broadinstitute.github.io/picard/>].
- 722 43. McKenna A, Hanna M, Banks E, Sivachenko A, Cibulskis K, Kernytsky A, et al. The  
723 Genome Analysis Toolkit: a MapReduce framework for analyzing next-generation  
724 DNA sequencing data. *Genome Res*. 2010;20:1297-303.
- 725 44. Quinlan AR, Hall IM. BEDTools: a flexible suite of utilities for comparing genomic  
726 features. *Bioinformatics*. 2010;26(6):841-2.
- 727 45. Sherry ST, Ward MH, Kholodov M, Baker J, Phan L, Smigielski EM, et al. dbSNP:  
728 the NCBI database of genetic variation. *Nucleic acids research*. 2001;29(1):308-11.
- 729 46. Keane TM, Goodstadt L, Danecek P, White MA, Wong K, Yalcin B, et al. Mouse  
730 genomic variation and its effect on phenotypes and gene regulation. *Nature*.  
731 2011;477(7364):289-94.

- 732 47. Obenchain V, Lawrence M, Carey V, Gogarten S, Shannon P, Morgan M.  
733 VariantAnnotation: a Bioconductor package for exploration and annotation of  
734 genetic variants. *Bioinformatics*. 2014;30(14):2076-8.
- 735 48. Fungtammasan A, Ananda G, Hile SE, Su MS, Sun C, Harris R, et al. Accurate  
736 typing of short tandem repeats from genome-wide sequencing data and its  
737 applications. *Genome Res*. 2015;25(5):736-49.
- 738 49. Afgan E, Baker D, Batut B, van den Beek M, Bouvier D, Cech M, et al. The Galaxy  
739 platform for accessible, reproducible and collaborative biomedical analyses: 2018  
740 update. *Nucleic Acids Res*. 2018;46(W1):W537-W44.
- 741 50. Lawrence M, Gentleman R, Carey V. rtracklayer: an R package for interfacing with  
742 genome browsers. *Bioinformatics*. 2009;25(14):1841-2.
- 743 51. Lawrence M, Huber W, Pages H, Aboyoun P, Carlson M, Gentleman R, et al.  
744 Software for computing and annotating genomic ranges. *PLoS Comput Biol*.  
745 2013;9(8):e1003118.
